# Supplementary material for: Oxytocin during labour and risk of severe postpartum haemorrhage: a population-based, cohort-nested case–control study
Source: HighWire-hosted journal article supplement (doi:10.1136/bmjopen-2011-000514), 2011-01-01
Supplement: BMJOpen-2011-000514_Appendix_for_online_only.pdf [file BMJOpen-2011-000514_Appendix_for_online_only.pdf]

## **Supporting Information Appendix**

### **Pithagore6 study: list of participating maternity units**

**Aurore perinatal network:** Clinique d'Amberieu en Bugey, Centre Hospitalier de Bourg en Bresse, Centre Hospitalier d'Oyonnax, Centre Hospitalier d'Aubenas, Clinique Pasteur (Valence), Centre Hospitalier de Privas, Centre Hospitalier de Die, Centre Hospitalier de Montélimar, Centre Hospitalier de Romans sur Isère, Centre Hospitalier de Valence, Clinique Générale (Valence), Centre Hospitalier de Bourgoin Jallieu, Clinique Saint Vincent de Paul (Bourgoin Jallieu), Clinique de Roussillon, Centre Hospitalier de Vienne, Clinique de Villefranche sur Saône, Clinique Champfleuri (Décines), Clinique du Val d'Ouest (Ecully), Centre Hospitalier de Givors, Centre Hospitalier La Croix-Rousse (Lyon), Centre Hospitalier Hôtel Dieu (Lyon), Centre Hospitalier Edouard Herriot (Lyon), Clinique Monplaisir (Lyon), Centre Hospitalier St Luc St Joseph (Lyon), Centre Hospitalier Lyon Sud, Clinique de Rilleux La Pape, Clinique Trenal (Vienne), Centre hospitalier de Ste Foy Les Lyon, Clinique Pasteur (St Priest), Clinique de l'union (Vaulx en Velin), Clinique de la Roseraie et des minguettes (Vénissieux), Centre Hospitalier de Villefranche sur Saône, Clinique du Tonkin (Villeurbanne).

**Alpes Isere perinatal network:** Centre Hospitalier de Voiron, Centre Hospitalier Nord (Grenoble), Clinique Belledonne (Grenoble), Clinique des Cèdres (Grenoble), Clinique des eaux claires (Grenoble).

**Loire Nord Ardeche perinatal network:** Centre Hospitalier d'Annonay, Centre Hospitalier de Feurs, Centre Hospitalier de Firminy, Centre Hospitalier de St Chamond, Centre Hospitalier de Montbrison, Centre Hospitalier de Roanne, Centre Hospitalier de St Etienne, Clinique Michelet (Saint Etienne), Centre Hospitalier de Moze.

**Savoie perinatal network:** Centre Hospitalier d'Aix les Bains, Centre Hospitalier d'Albertville, Centre Hospitalier d'Annemasse Bonneville, Clinique de Savoie (Annemasse), Centre Hospitalier d'Annecy, Clinique Generale (Annecy), Centre Hospitalier de Belley, Centre Hospitalier de Bourg St Maurice, Centre Hospitalier de Chambéry, Clinique de l'Esperance (Cluses), Centre Hospitalier du Léman (Thônon-Evian les bains), Centre Hospitalier de St Julien en Genevois, Centre Hospitalier de St Jean de Maurienne, Centre Hospitalier du Mont Blanc (Sallanches-Chamonix).

**Port-Royal St Vincent de Paul perinatal network:** Centre Hospitalier Cochin (Paris), Centre Hospitalier de Nanterre, Centre Hospitalier Pitié-Salpêtrière (Paris), Clinique Isis (Paris), Centre Hospitalier Les Diaconesses (Paris), Centre Hospitalier Saint-Antoine (Paris), Centre Hospitalier Les bluets (Paris), Clinique du Mousseau (Evry), Centre Hospitalier de Juvisy, Centre Hospitalier Beaujon (Paris), Centre Hospitalier Louis Mourier (Colombes), Clinique Lambert (La Garenne Colombes), Centre Hospitalier de Courbevoie-Neuilly, Clinique Ste Isabelle (Neuilly), Clinique les Martinets (Rueil Malmaison), Centre Hospitalier de St Cloud, Centre Hospitalier Jean Rostand (Sèvres), Centre Hospitalier Foch (Suresnes), Hôpital privé Armand Brillard (Nogent sur Marne ), Centre Hospitalier Bégin (Vincennes), Hôpital privé Nord parisien (Sarcelles), Maternité des Lilas.

**PerinatCentre perinatal network:** Clinique Guillaume deVayre (Saint Doulchard), Centre Hospitalier de Bourges, Centre Hospitalier de Vierzon, Centre Hospitalier de St Amand Montrond, Centre Hospitalier de Chateaudun, Clinique St Francois (Chateauroux), Centre Hospitalier de Chartres, Centre Hospitalier de Chateauroux, Centre Hospitalier de Le Blanc, Clinique St Francois ( Mainvillers), Clinique du Parc (Chambray), Centre Hospitalier de Chinon, Centre Hospitalier de Tours, Centre Hospitalier de Dreux, Centre Hospitalier de Blois, Clinique St Cœur (Vendôme), Clinique St Come (Blois), Centre Hospitalier de Romorantin, Centre Hospitalier d'Orleans, Centre Hospitalier de Pithiviers, Polyclinique des longues allées (Saint Jean de Braye), Centre Hospitalier de Montargis, Centre Hospitalier de Gien.
